# Supplementary material for: Flood drivers and trends: a case study of the Geul River Catchment (the Netherlands) over the past half century
Source: Copernicus journal article supplement (doi:10.5194/hess-2023-263), 2023-11-15
Supplement: Supplementary file 1 [file hess-2023-263-supplement.pdf]

# S1 Multi-temporal trend analysis

## S1.1 Winter half-year

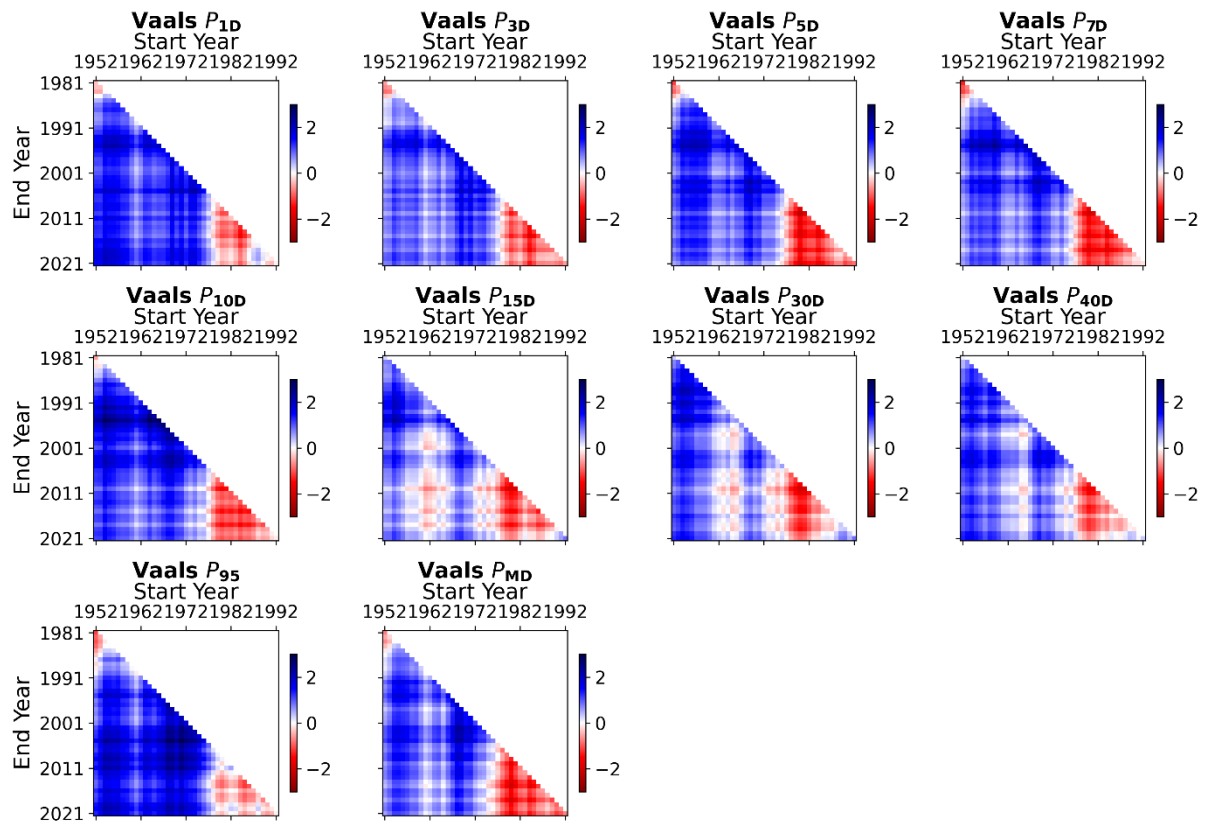

**Figure S1.** Multi-temporal trend analysis for the developed (extreme) precipitation indices at Vaals for winter half-year. Each pixel presents a fixed period, and the color indicates the resulted Z-statistic value using the Mann-Kendall test.

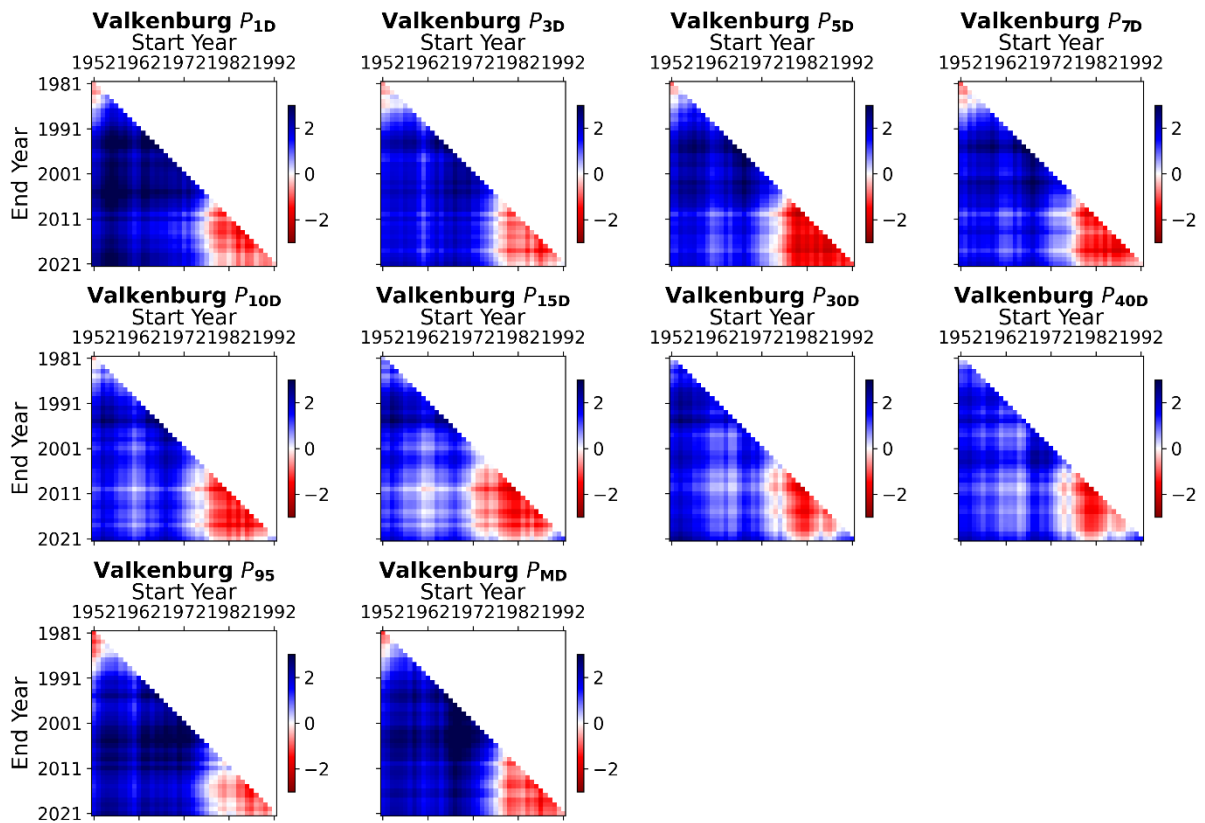

**Figure S2.** Multi-temporal trend analysis for the developed (extreme) precipitation indices at Valkenburg for winter half-year. Each pixel presents a fixed period, and the color indicates the resulted Z-statistic value using the Mann-Kendall test.

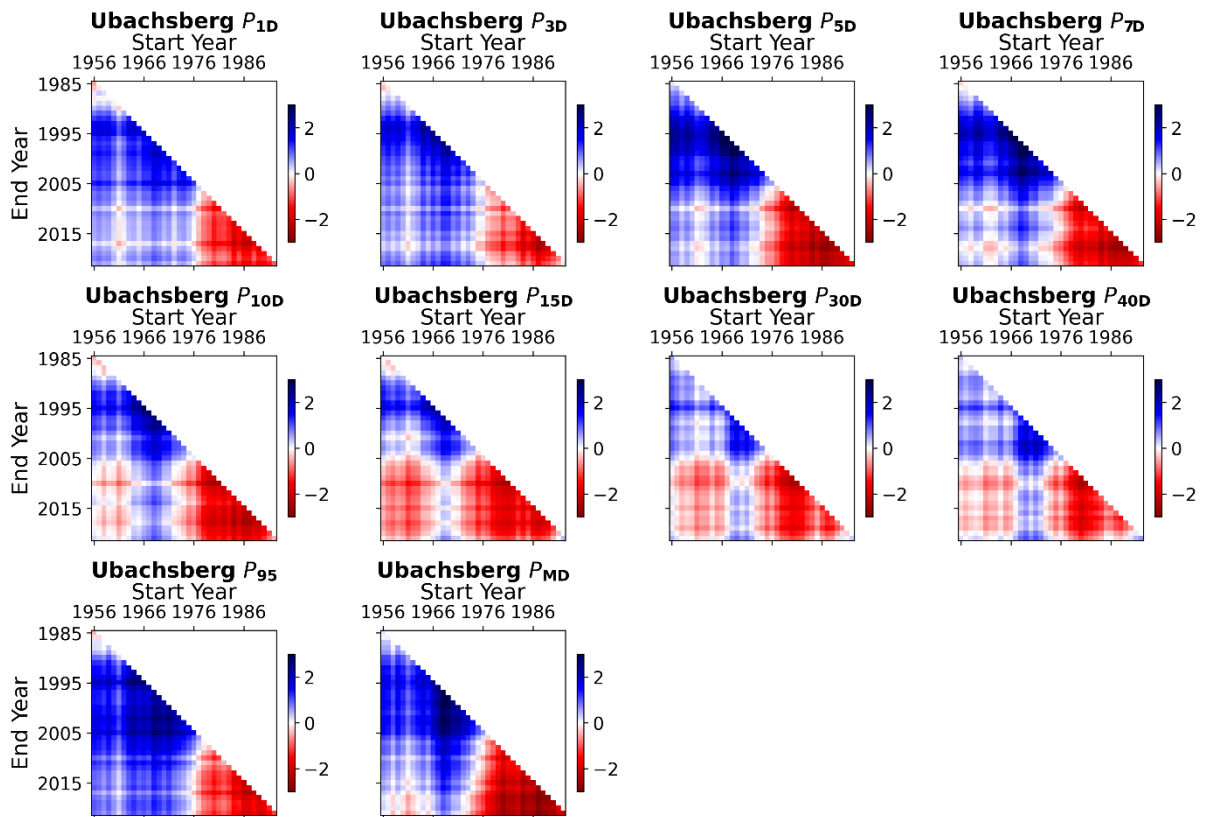

**Figure S3.** Multi-temporal trend analysis for the developed (extreme) precipitation indices at Ubachsberg for winter half-year. Each pixel presents a fixed period, and the color indicates the resulted Z-statistic value using the Mann-Kendall test.

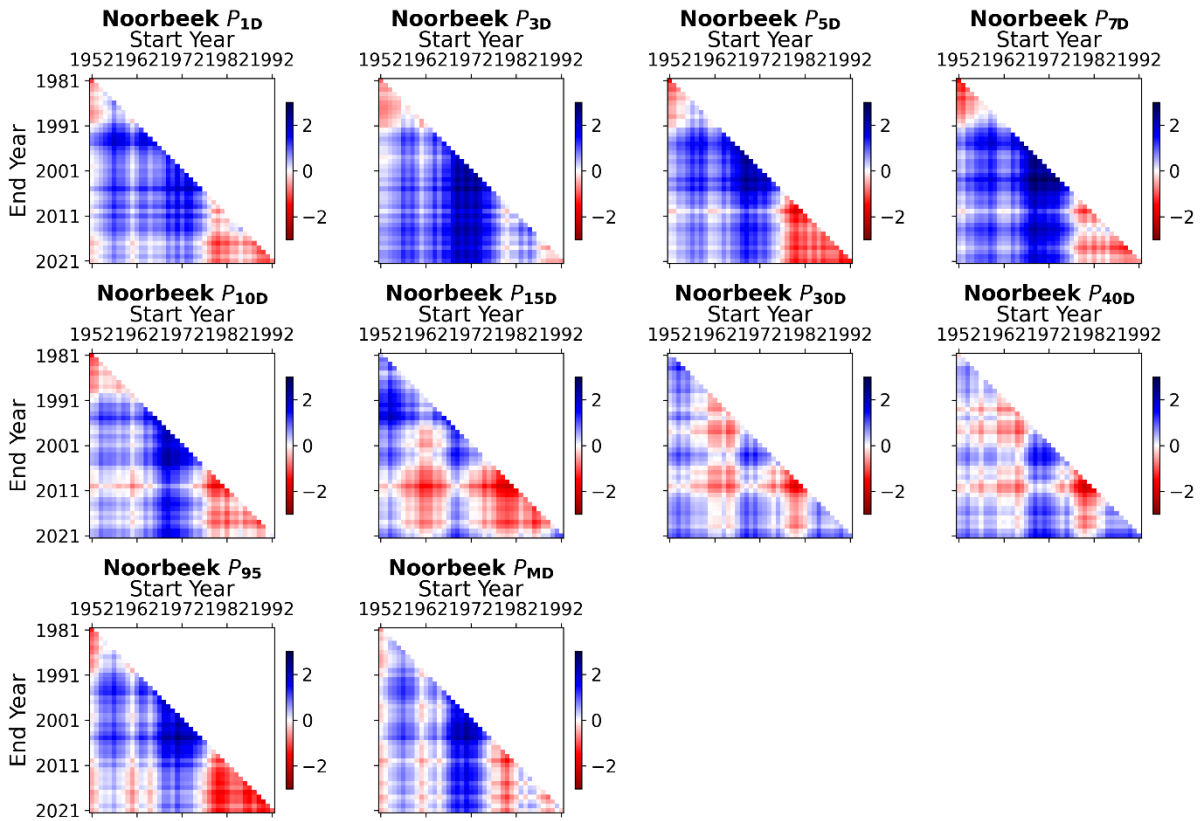

**Figure S4.** Multi-temporal trend analysis for the developed (extreme) precipitation indices at Noorbeek for winter half-year. Each pixel presents a fixed period, and the color indicates the resulted Z-statistic value using the Mann-Kendall test.

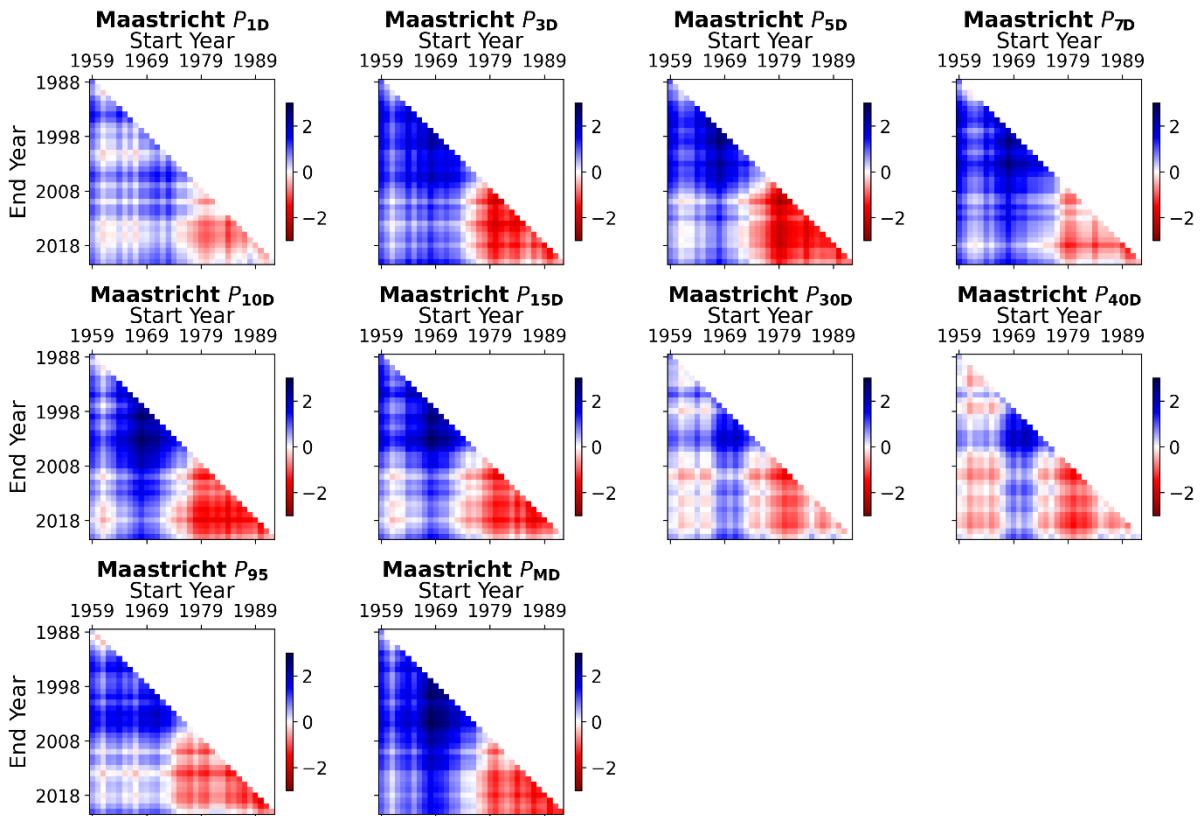

**Figure S5.** Multi-temporal trend analysis for the developed (extreme) precipitation indices at Maastricht for winter half-year. Each pixel presents a fixed period, and the color indicates the resulted Z-statistic value using the Mann-Kendall test.

## S1.2 Summer half-year

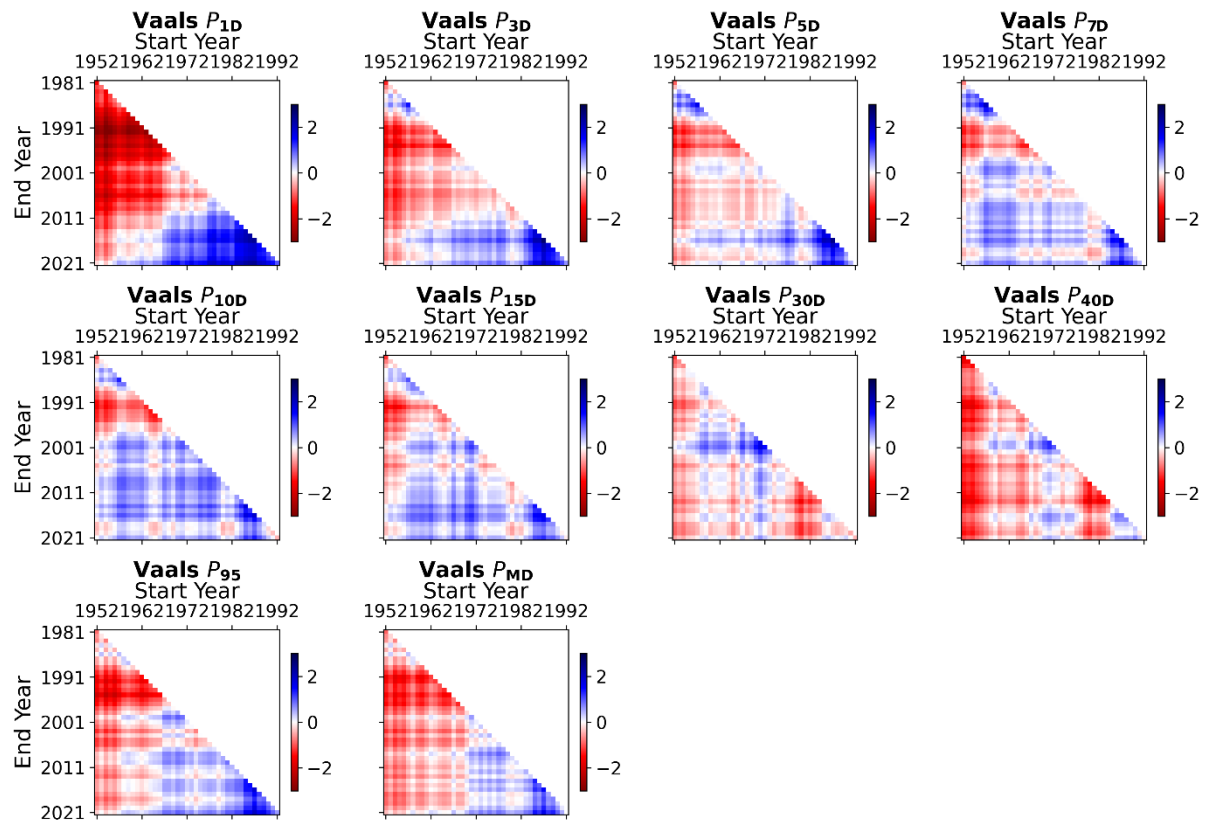

**Figure S6.** Multi-temporal trend analysis for the developed (extreme) precipitation indices at Vaals for summer half-year. Each pixel presents a fixed period, and the color indicates the resulted Z-statistic value using the Mann-Kendall test.

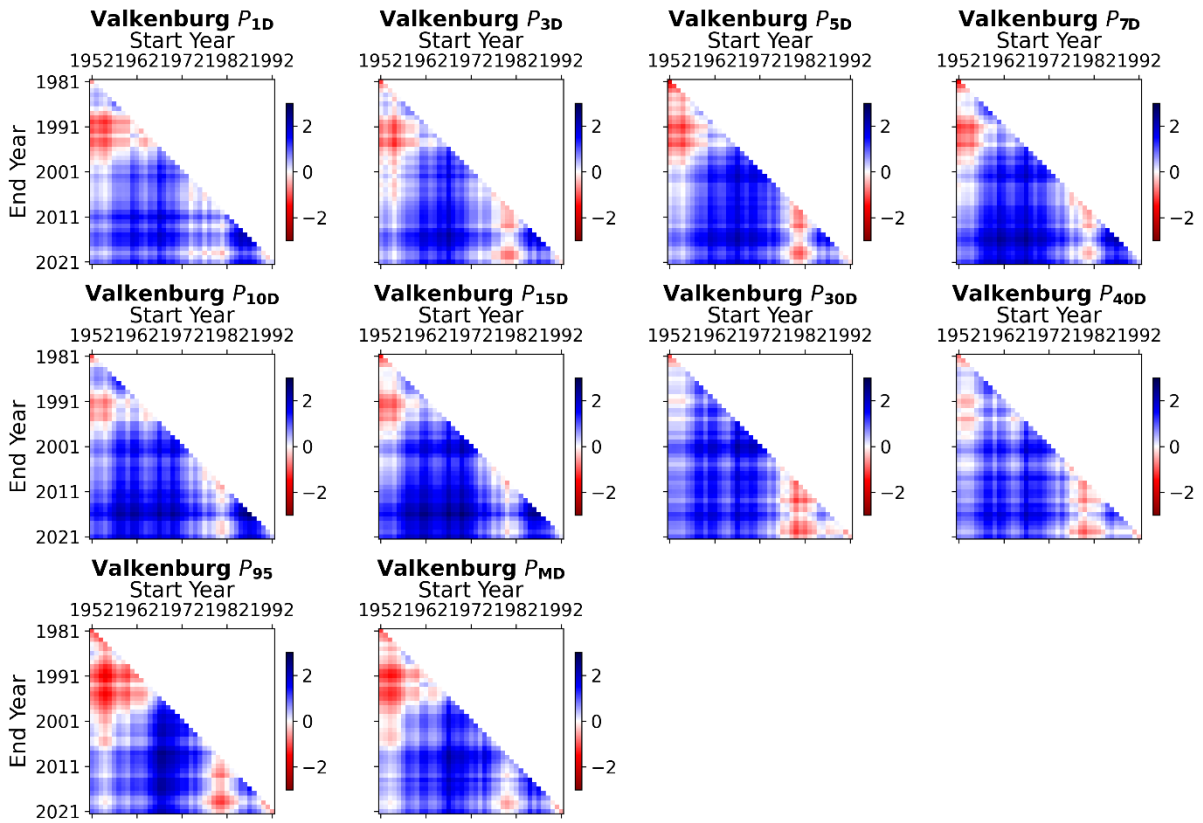

**Figure S7.** Multi-temporal trend analysis for the developed (extreme) precipitation indices at Valkenburg for summer half-year. Each pixel presents a fixed period, and the color indicates the resulted Z-statistic value using the Mann-Kendall test.

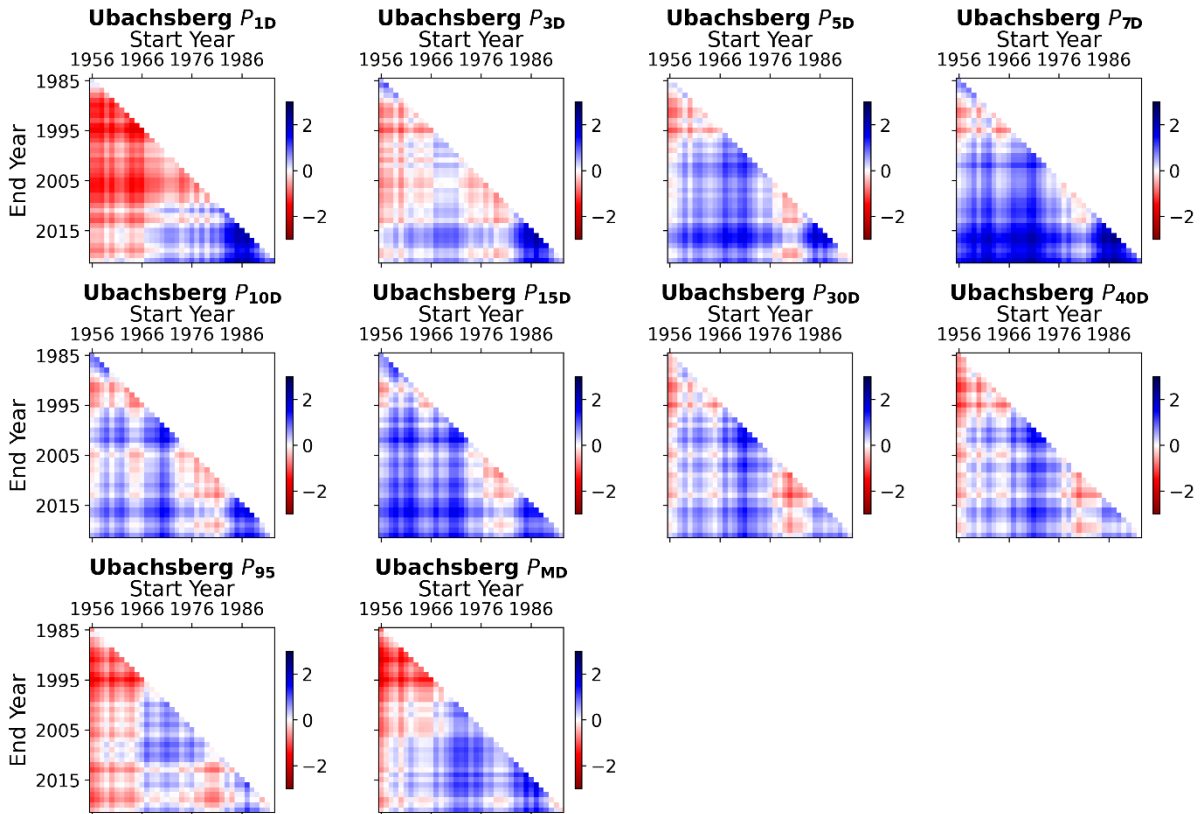

**Figure S8.** Multi-temporal trend analysis for the developed (extreme) precipitation indices at Ubachsberg for summer half-year. Each pixel presents a fixed period, and the color indicates the resulted Z-statistic value using the Mann-Kendall test.

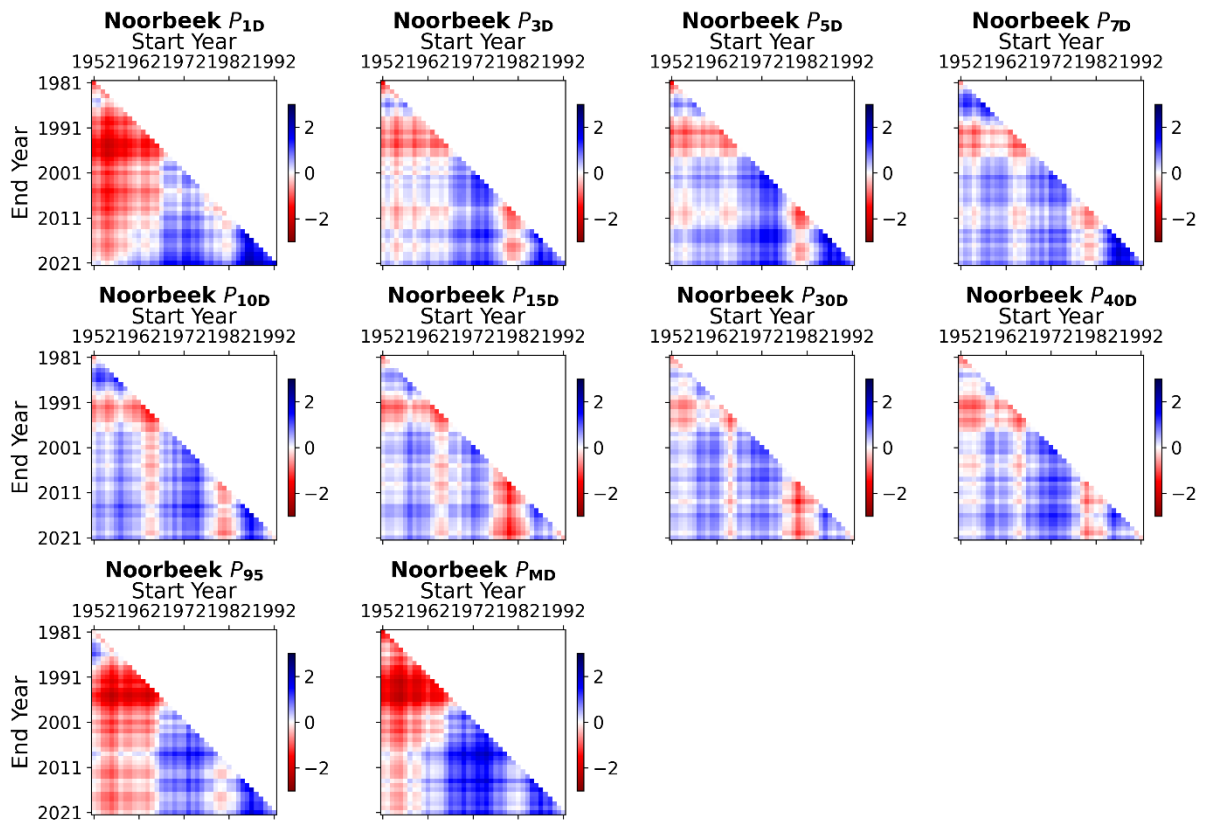

**Figure S9.** Multi-temporal trend analysis for the developed (extreme) precipitation indices at Noorbeek for summer half-year. Each pixel presents a fixed period, and the color indicates the resulted Z-statistic value using the Mann-Kendall test.

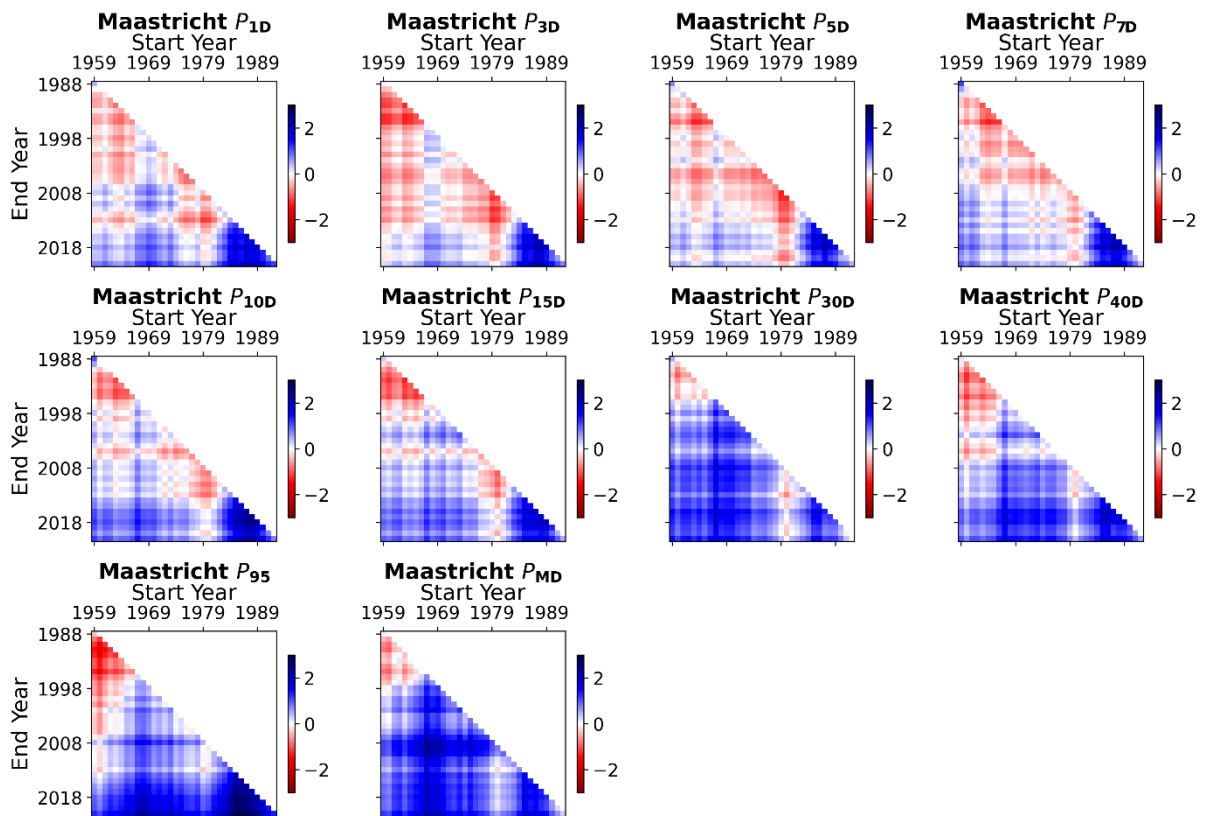

**Figure S10.** Multi-temporal trend analysis for the developed (extreme) precipitation indices at Maastricht for summer half-year. Each pixel presents a fixed period, and the color indicates the resulted Z-statistic value using the Mann-Kendall test.
